# Supplementary material for: Synthesis of mesoporous palladium with tunable porosity and demonstration of its thermal stability by in situ heating and environmental transmission electron microscopy
Source: Royal Society of Chemistry journal article supplement (doi:10.1039/c2ta00190j), 2012-10-23
Supplement: c2ta00190j.pdf [file c2ta00190j.pdf]

## Synthesis of Mesoporous Palladium with High Thermal Stability and Tunable Pore Size for Hydrogen Isotope Storage

Patrick J. Cappillino<sup>a</sup>, Khalid M. Hattar<sup>b</sup>, Blythe G. Clark<sup>b</sup>, Ryan J. Hartnett<sup>a</sup>, Vitalie Stavila<sup>a</sup>, Michelle A. Hekmaty<sup>a</sup>, Benjamin W. Jacobs<sup>c</sup>, and David B. Robinson<sup>a,\*</sup>

<sup>a</sup> Sandia National Laboratories, PO Box 969, Mail Stop 9292, Livermore, CA, USA. Tel: 925-294-6613 E-mail: drobins@sandia.gov

<sup>b</sup> Protochips, Inc, 617 Hutton Street Suite 111, Raleigh, NC, USA. Tel: 919-341-2612

Sandia National Laboratories is a multi-program laboratory managed and operated by Sandia Corporation, a wholly owned subsidiary of Lockheed Martin Corporation, for the U.S. Department of Energy's National Nuclear Security Administration under contract DE-AC04-94AL85000.

Supplemental Information: Figures S1-S5, Table S1, description of video

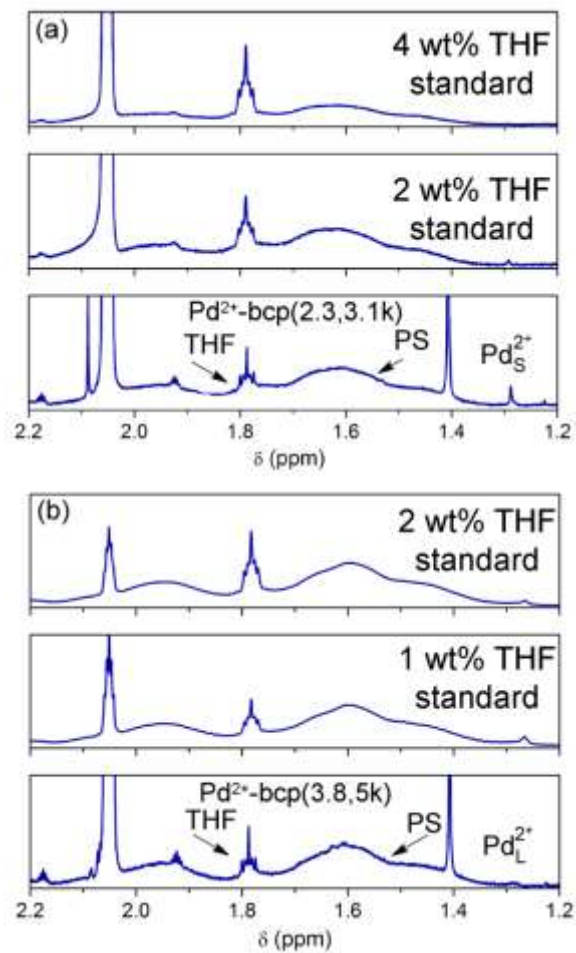

Figure S1. NMR spectra of bcp(2.3,3.1k) (a) and bcp(3.8,5k) (b) in  $d_6$ -acetone. Top two spectra in (a) and (b) are calibration standards and bottom spectra are Pd<sup>2+</sup>-loaded LLC pastes subsequent to THF removal, immediately prior to metal salt reduction

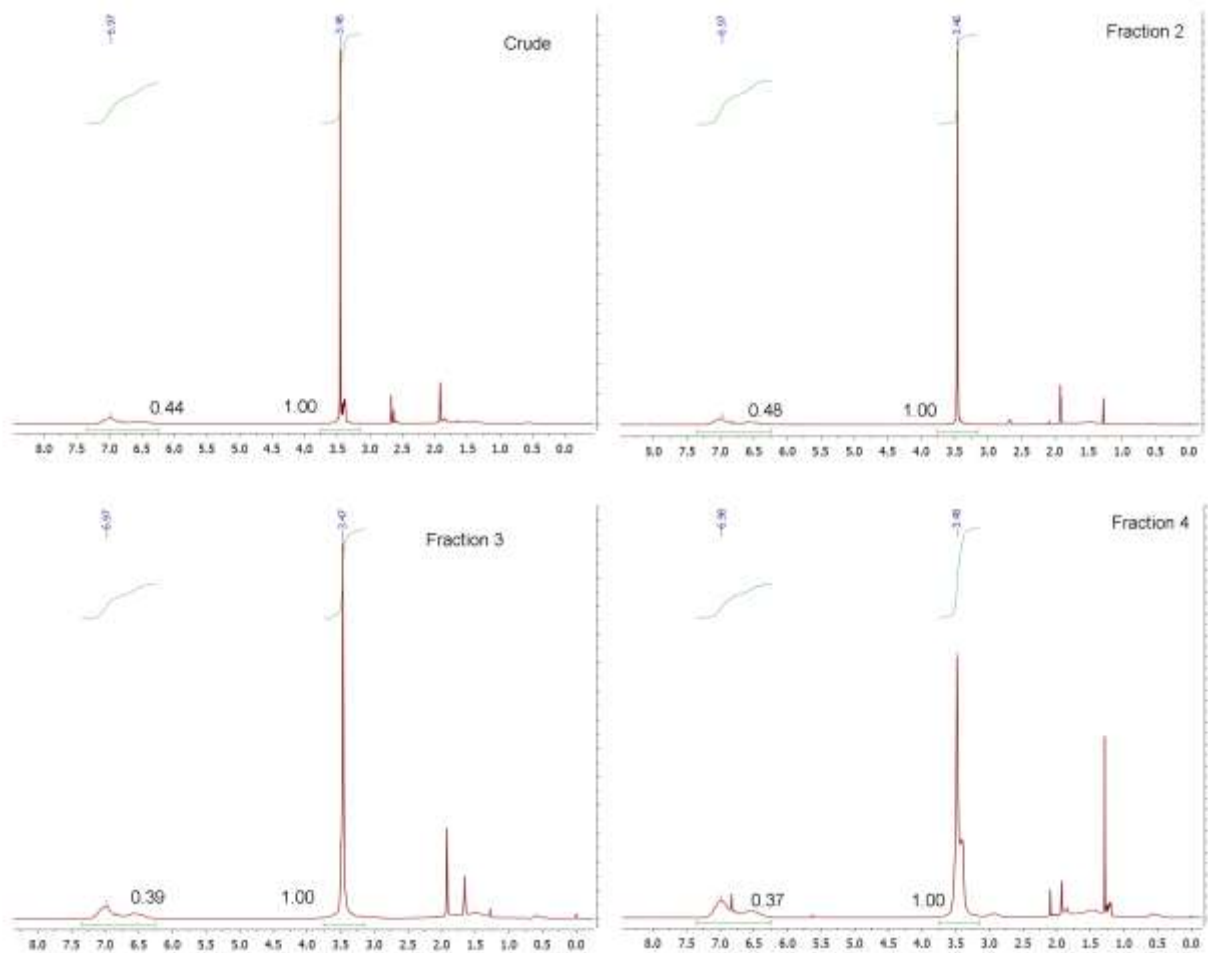

Figure S2. NMR spectra of the THF wash subsequent to Pd<sub>5</sub> synthesis (crude) and fractions two, three and four from THF elution on a silica column (60 mL fractions), in d<sub>6</sub>-acetone. Peaks between 7.35 and 6.25 ppm are from the poly(styrene) block, and peaks between 3.75 and 3.15 are from the poly(ethylene oxide) block.

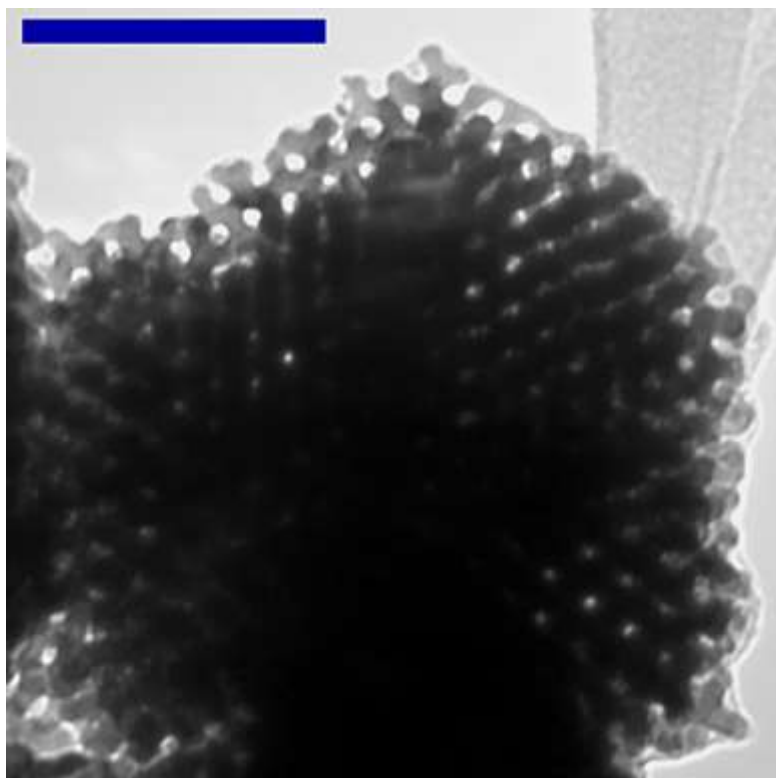

Figure S3. Porous Pd ( $\text{Pd}_s$ ) synthesized from bcp(2.3,3.1k) purified after an initial use and recycled. (scalebar is calibrated to 100 nm)

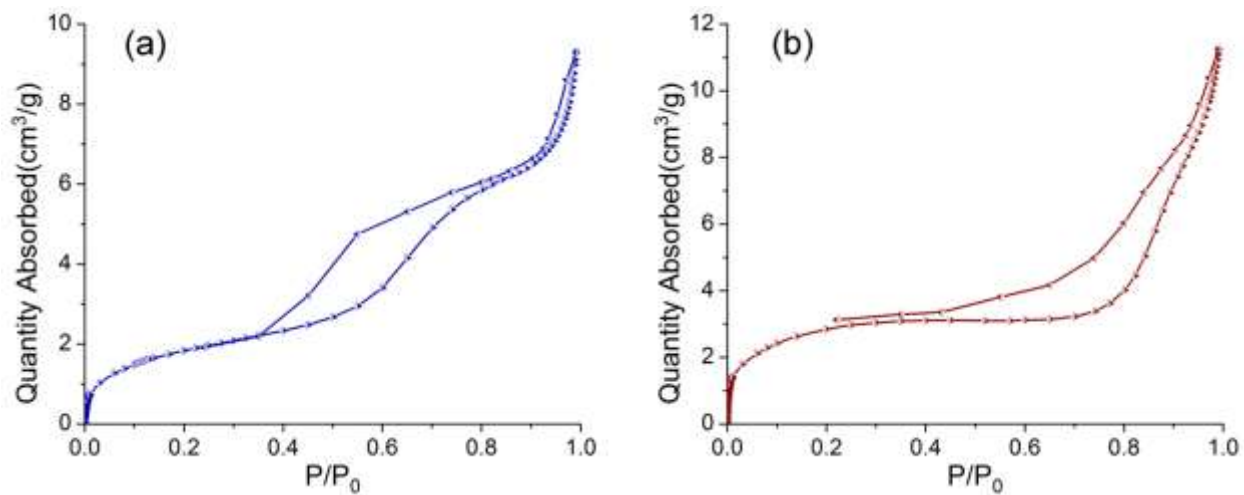

Figure S4. Nitrogen adsorption isotherms collected at 77K for Pd<sub>S</sub> (a) and Pd<sub>L</sub> (b)

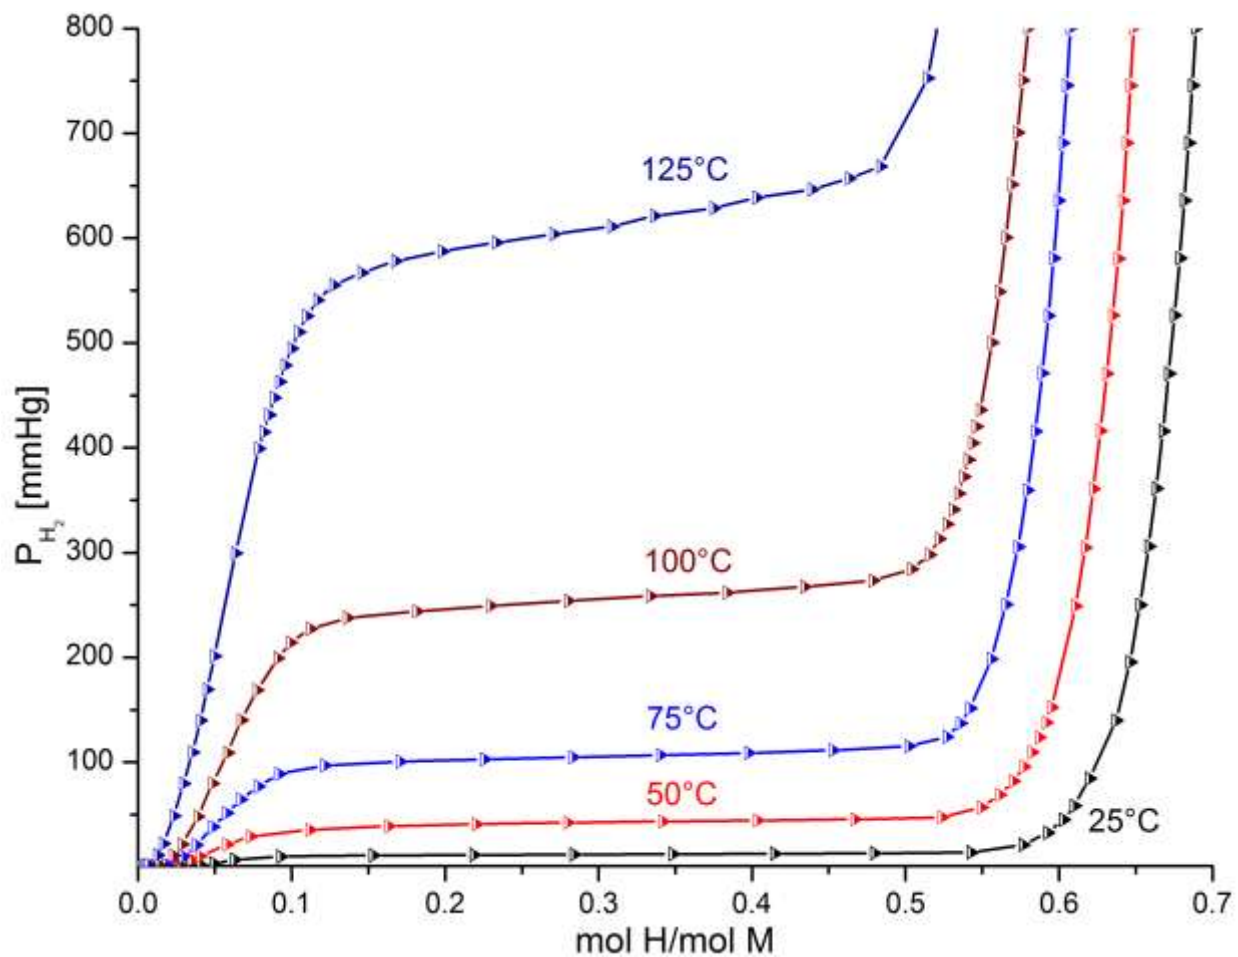

Figure S5. Linear H<sub>2</sub> storage isotherms at temperatures from 25°C to 125°C

### **Table S1. Rietveld refinement results**

#### **Sample 3.8,5k**

|                                    |                |
|------------------------------------|----------------|
| Space group (No.)                  | F m -3 m (225) |
| Lattice parameters                 |                |
| a=b=c/ Å                           | 3.8909(3)      |
| $\alpha=\beta=\gamma/^\circ$       | 90             |
| V/ 10 <sup>6</sup> pm <sup>3</sup> | 58.90426       |
| Pref. orientation direction/ hkl   | 1.00 0.00 0.00 |
| Pref. orientation parameter        | 0.947(6)       |
| R (Bragg)/ %                       | 1.14           |
| Crystallite Size/ Å                | 105.0          |

#### **Sample 2.3,3.1**

|                                    |                |
|------------------------------------|----------------|
| Space group (No.)                  | F m -3 m (225) |
| Lattice parameters                 |                |
| a=b=c/ Å                           | 3.8912(1)      |
| $\alpha=\beta=\gamma/^\circ$       | 90             |
| V/ 10 <sup>6</sup> pm <sup>3</sup> | 58.91829       |
| Pref. orientation direction/ hkl   | 0.00 0.00 1.00 |
| Pref. orientation parameter        | 1.015428       |
| R (Bragg)/ %                       | 1.17           |
| Crystallite Size/ Å                | 198.4          |

Description of supplemental video: The video, encoded with the Windows Media Video 9 codec in Adobe Premier, shows the particle in Figure 8 during the first 6 s pulse to 250°C. The video is about 50% slower than real time. A drift correction algorithm written by Joshua D. Sugar and David B. Robinson of Sandia National Laboratories was applied, and is the cause of the shifting border.
